# Aberrantly glycosylated integrin $\alpha 3\beta 1$ is a unique urinary biomarker for the diagnosis of bladder cancer

Di Jin<sup>1</sup>, Ruiyun Zhang<sup>1</sup>, Haige Chen<sup>1</sup>, Chong Li<sup>2,3</sup>

<sup>1</sup>Department of Urology, Ren Ji Hospital, School of Medicine, Shanghai Jiao Tong University, Shanghai 200127, China

<sup>2</sup>Core Facility for Protein Research, Institute of Biophysics, Chinese Academy of Sciences, Beijing 100101, China

<sup>3</sup>Beijing Jianlan Institute of Medicine, Beijing 100190, China

**Correspondence to:** Chong Li, Haige Chen; **email:** [lichong@moon.ibp.ac.cn](mailto:lichong@moon.ibp.ac.cn), [kirbyhaige@aliyun.com](mailto:kirbyhaige@aliyun.com)

**Keywords:** bladder cancer, urinary biomarker, aberrantly glycosylated integrin  $\alpha 3\beta 1$ , diagnosis

**Received:** February 20, 2020

**Accepted:** April 28, 2020

**Published:** June 13, 2020

**Copyright:** Jin et al. This is an open-access article distributed under the terms of the Creative Commons Attribution License (CC BY 3.0), which permits unrestricted use, distribution, and reproduction in any medium, provided the original author and source are credited.

## ABSTRACT

Bladder cancer (BC) is the most common malignancy of the urinary tract. We developed a new and ELISA kit for detecting aberrantly glycosylated integrin  $\alpha 3\beta 1$  (AG31) in human urine. We analysed urine samples (n=408) of patients with BC, renal cell carcinoma (RCC), prostate cancer (PC), cystitis, nephritis, and prostatitis from two centres in China. The subjects in the validation groups (n=2317) were recruited from other centres in China between July 2012 and September 2013. Receiver operating characteristic (ROC) curves were used to determine diagnostic accuracy. AG31 levels in urine samples were significantly higher in patients with BC than in any of the control subjects. Moreover, elevated levels of AG31 in urine could distinguish BC from benign inflammatory diseases. Finally, the urinary AG31 test was much more sensitive and specific than the NMP22 test. Therefore, the urinary AG31 test will provide an ideal and assay for the detection of BCs.

## INTRODUCTION

Bladder cancer (BC) is the most common malignancy of the urinary tract and ranks as the fourth most common cancer in men [1]. Tumours of the urinary bladder present either as non-muscle-invasive bladder cancer (NMIBC) or as muscle-invasive bladder cancer (MIBC). Approximately 75% of BC patients present with NMIBC at first diagnosis (Ta, T1 or tumour in situ (Tis)), and 25% present with muscle-invasive disease with a high risk of death from distant metastasis [2, 3]. Approximately 70% of NMIBCs recur, and the tumours of as many as 10% to 20% of patients will eventually progress to muscle-invasive cancer after treatment [4]. Different interventions against NMIBC change the biological and clinical behaviour of the disease [5]. Thus, early diagnosis and monitoring of the progression of BC are critical for successful treatment.

Cystoscopy and voided urine cytology are the most commonly used methods for the diagnosis and monitoring of BC recurrence and progression. Cystoscopy, the gold standard for the detection of BC, allows direct visualization and biopsy of the bladder urothelium. However, cystoscopy is invasive and relatively expensive, which limits its use. Cytologic testing of voided urine is the most commonly utilized non-invasive method for detecting BC. Voided urine cytology has good sensitivity for high-grade BC, but its sensitivity for the detection of low-grade tumours is only 4% to 31% [6]. Over the last decade, some urine-based assays, including one involving nuclear mitotic apparatus protein 22 (NMP22), a marker that has been marketed to diagnose BC, have been developed, but no markers have reached widespread use due to their low specificities [7–10]. Thus, cost-effective and non-invasive tools for the early diagnosis and lifelong surveillance of BC are urgently needed.

Integrins, a large family of cell membrane receptors, are involved in a variety of processes, including cell proliferation, migration, and cell extracellular matrix adhesion [11]. Integrin  $\alpha3\beta1$  acts as a high-affinity receptor for laminin, fibronectin, and collagen, whose interactions play critical roles in organogenesis and the maintenance of epithelial tissues [12, 13]. It has been reported that glycosylated integrin  $\alpha3\beta1$  appears in BC cells [14]. Notably, aberrant glycosylation has been implicated in the tumourigenesis of several tumour types [15, 16]. We previously generated an antibody, BCMab1, that specifically recognizes the aberrantly glycosylated integrin  $\alpha3\beta1$  (AG31) epitope on the membranes of BC cells [17]. We demonstrated that AG31 is specifically expressed in BC tissues but not in normal or other tumour tissues. AG31-mediated signalling triggers FAK activation in the tumourigenesis of BC. Furthermore, AG31 expression levels in tumour tissues are positively correlated with clinical severity and the prognosis of BC patients [17]. In this large-scale, multicentre validation study, we developed an ELISA-based assay to quantitatively detect AG31 levels in the voided urine of patients with BC or other urologic tumours. Our data show that the urinary AG31 test is a promising assay for the detection of BC.

## RESULTS

### Study groups

We recruited 2725 participants overall: 408 in the test groups and 2317 in the validation groups (Figure 1). Of all the participants, 1314 had BC, and their demographic characteristics, modes of presentation, tumour stages and tumour grades are summarized in Table 1. The test population was predominantly male (78.8%), and 46.7% were over 63 years of age. Of those with a recorded presentation, 10.3% had visible haematuria, and 89.7% had non-visible haematuria. A total of 72.8% of patients had no recurrence, 14.7% experienced recurrence, and 12.5% were lost to follow-up. A total of 1130 BC patients were enrolled into the validation groups, and their clinicopathological characteristics were well matched to those of the test groups (Table 1); these two groups were well matched for age. Additionally, the patients with non-BC urologic conditions were also matched for age. Cut-off points were set as follows: 65 years of age for RCC, PC and cystitis patients, 47 years of age for nephritis patients, and 57 years of age for prostatitis patients (Supplementary Table 1).

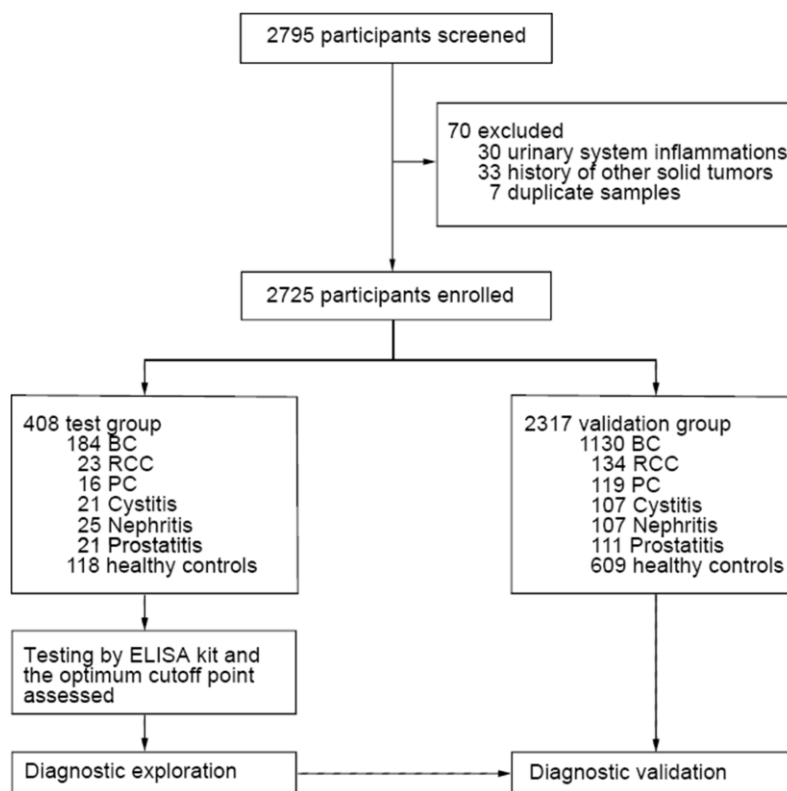

Figure 1. Patient selection process and classification. Overall patient selection process and their classification based on types of diseases.

**Table 1. Demographic and clinicopathologic characteristics of patients with bladder cancer in the test and validation groups.**

| Variable           | Test (n=184) |                | Validation (n=1130) |                | p value |
|--------------------|--------------|----------------|---------------------|----------------|---------|
|                    | No.          | Percentage (%) | No.                 | Percentage (%) |         |
| Age (y)            |              |                |                     |                |         |
|                    | ≤63          | 92             | 50.0                | 490            | 43.4    |
|                    | >63          | 86             | 46.7                | 609            | 53.9    |
|                    | Missing      | 6              | 3.3                 | 31             | 2.7     |
| Gender             |              |                |                     |                |         |
|                    | Female       | 32             | 17.4                | 234            | 20.7    |
|                    | Male         | 145            | 78.8                | 868            | 76.8    |
|                    | Missing      | 7              | 3.8                 | 28             | 2.5     |
| Pathological stage |              |                |                     |                |         |
|                    | Ta+ T1       | 134            | 72.8                | 924            | 81.8    |
|                    | T2+T3+T4     | 50             | 27.2                | 206            | 18.2    |
| Pathological grade |              |                |                     |                |         |
|                    | G1           | 69             | 37.5                | 279            | 24.7    |
|                    | G2+G3        | 114            | 62.0                | 851            | 75.3    |
|                    | Missing      | 1              | 0.5                 |                |         |
| Hematuria          |              |                |                     |                |         |
|                    | Visible      | 19             | 10.3                | 360            | 31.9    |
|                    | Not-visible  | 165            | 89.7                | 770            | 68.1    |
| Tumor recurrence   |              |                |                     |                |         |
|                    | Yes          | 27             | 14.7                | 188            | 16.6    |
|                    | No           | 134            | 72.8                | 887            | 78.5    |
|                    | Missing      | 23             | 12.5                | 55             | 4.9     |

### Urinary AG31 is a sensitive marker for the detection of bladder cancer

To detect AG31 levels in voided urine samples, an ELISA-based assay kit was developed by our laboratory (Supplementary Figure 1A). We generated several monoclonal antibodies that could recognize the AG31 molecule on BC tumours as previously described [17]. For establishment of the ELISA, we screened out an antibody termed BCMab3 as the capture antibody, which could strongly bind to AG31. The BCMab1 antibody also specifically recognizes AG31 on BC tumours [17], and BCMab1-conjugated horseradish peroxidase (HRP) served as the detection antibody. This ELISA kit could be used to accurately measure urinary AG31 levels (Supplementary Figure 1B). Relative light units (RLUs) were used to indicate the test levels of AG31 concentrations in urine.

In the test group, urinary AG31 concentrations in the BC patients were significantly higher than those in the healthy controls (median 6525, interquartile range (IQR) 3600-26,585; mean 54,768, standard deviation (SD) 276,559 [BC patients] vs median 576, IQR 378-988; mean 859, SD 819 [healthy controls];  $p < 0.0001$ ) (Figure 2A, and Supplementary Table 2). Notably, the urinary AG31 levels in patients with RCC, PC, cystitis,

nephritis, or prostatitis were comparable to those in healthy individuals (Figure 2A and Supplementary Table 2). The ROC curves were plotted for urinary AG31 in BC patients versus different test groups. For BC patients from all test groups, the area under the curve (AUC) of AG31 was 0.9567 (95% CI 0.9337-0.9797), with a sensitivity of 90.76% and specificity of 91.52% (Figure 1C, and Table 2). The optimum cut-off value was set to 1991 (Supplementary Figure 1C). The four ROC curves of AG31 levels between the BC patients and different test groups showed that the AUCs were greater than 95% (Figure 2C, and Table 2). These results were confirmed by the corresponding validation group tests (Figure 2B, 2D). Predictive values and likelihood ratios for AG31 in the diagnosis of BC are shown in Table 2. Altogether, the urinary AG31 test can distinguish BC patients from patients with other urologic tumours and benign inflammatory diseases.

### Urinary AG31 levels are well correlated with the clinicopathologic features of bladder cancer

In the test group, the urinary AG31 levels of the BC patients with different disease stages were much higher than those of the healthy controls (Figure 3A, and Supplementary Table 2). Moreover, urinary AG31 levels were significantly increased in patients with high-

stage BC. These observations were further confirmed in the validation group (Figure 3B and Supplementary Table 2). Furthermore, the AUCs for the AG31 levels of the BC patients with the different disease stages were greater than 92%, with sensitivities over 89% and specificities over 90% (Supplementary Figure 2, and Supplementary Table 3). Similarly, urinary AG31 levels increased with advancing pathological grade (Figure 3C, D, Supplementary Figure 3, Supplementary Tables 2, 3). Correlation analysis showed that urinary AG31 levels were positively correlated with tumour stage and grade (both  $p < 0.01$ ). Taken together, these data indicate

that AG31 levels are well correlated with the clinicopathologic features of BCs.

### Urinary AG31 test is diagnostically accurate for NMIBC patients

Approximately 70% of BC patients with NMIBC (Tis+Ta+T1) will experience one or more recurrences after transurethral resection (TUR), and the BCs 10%-20% of patients will eventually progress to MIBC (3,26). Regarding recurrence and progression, patients with NMIBC are classified as low/intermediate- and

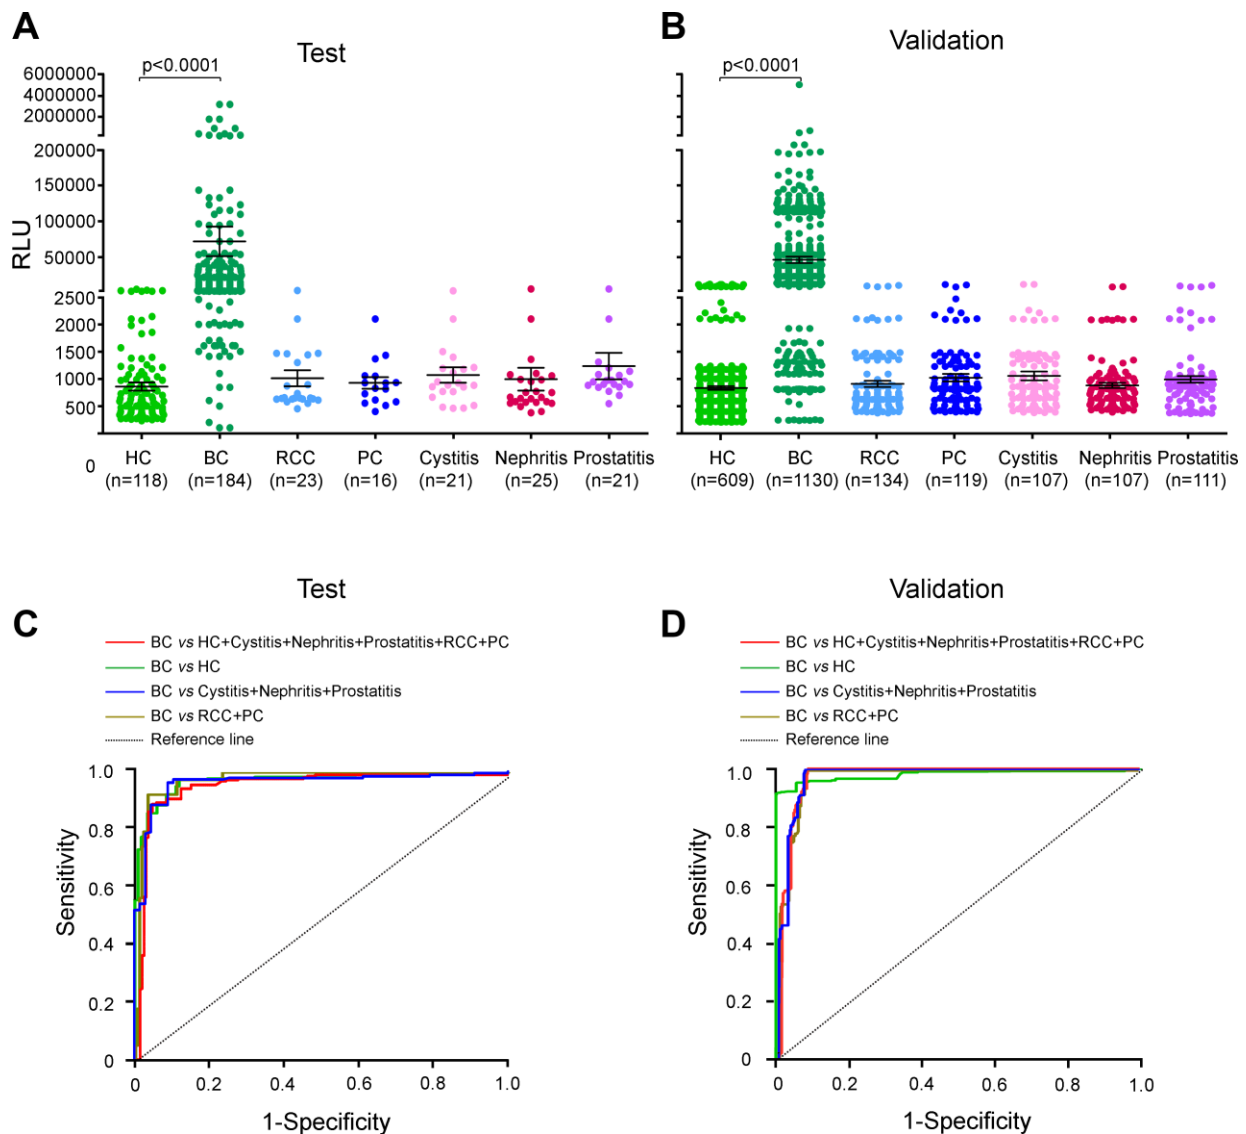

**Figure 2. Urinary AG31 levels are elevated in bladder cancers in the test and validation groups.** (A) Urinary AG31 levels for test groups. (B) Urinary AG31 levels for validation groups. Black horizontal lines are means, and error bars are SEs. Urinary AG31 levels were measured with RLU (relative light unit). HC, healthy control; BC, bladder cancer; RCC, renal cell carcinoma; PC, prostate cancer. (C) ROC curves for all patients with bladder cancer versus all controls in the test groups. (D) ROC curves for all patients with bladder cancer versus all controls in the validation groups. Jagged curves denote ROC curves; diagonal lines represent reference lines. HC, healthy control; BC, bladder cancer; RCC, renal cell carcinoma; PC, prostate cancer.

**Table 2. Urinary AG31 test for the diagnosis of bladder cancers.**

| Test                                           |             |             |        |        |                | Validation     |                               |             |             |        |        |                |                |
|------------------------------------------------|-------------|-------------|--------|--------|----------------|----------------|-------------------------------|-------------|-------------|--------|--------|----------------|----------------|
| AUC<br>(95% CI)                                | Sensitivity | Specificity | PPV    | NPV    | Positive<br>LR | Negative<br>LR | AUC<br>(95% CI)               | Sensitivity | Specificity | PPV    | NPV    | Positive<br>LR | Negative<br>LR |
| BC vs HC+Cystitis+Nephritis+Prostatitis+RCC+PC |             |             |        |        |                |                |                               |             |             |        |        |                |                |
| 0.9567<br>(0.9337-<br>0.9797)                  | 0.9076      | 0.9152      | 0.8978 | 0.9234 | 10.7002        | 0.1010         | 0.9760<br>(0.9694-<br>0.9826) | 0.9230      | 0.9292      | 0.9255 | 0.9269 | 13.0430        | 0.0829         |
| BC vs HC                                       |             |             |        |        |                |                |                               |             |             |        |        |                |                |
| 0.9597<br>(0.9368-<br>0.9826)                  | 0.9076      | 0.9153      | 0.9435 | 0.8640 | 10.7098        | 0.1009         | 0.9801<br>(0.9741-<br>0.9862) | 0.9230      | 0.9442      | 0.9684 | 0.8686 | 16.5327        | 0.0815         |
| BC vs Cystitis+Nephritis+Prostatitis           |             |             |        |        |                |                |                               |             |             |        |        |                |                |
| 0.9500<br>(0.9200-<br>0.9801)                  | 0.9076      | 0.9104      | 0.9653 | 0.7821 | 10.1350        | 0.1015         | 0.9714<br>(0.9636-<br>0.9791) | 0.9230      | 0.9108      | 0.9729 | 0.7728 | 10.3441        | 0.0845         |
| BC vs RCC+PC                                   |             |             |        |        |                |                |                               |             |             |        |        |                |                |
| 0.9592<br>(0.9328-<br>0.9856)                  | 0.9076      | 0.9231      | 0.9824 | 0.6792 | 11.7989        | 0.1001         | 0.9720<br>(0.9644-<br>0.9796) | 0.9230      | 0.9170      | 0.9803 | 0.7273 | 11.1201        | 0.0840         |

HC, healthy control; BC, bladder cancer; RCC, renal cell carcinoma; PC, prostate cancer; AUC, area under curve; PPV, positive predictive value; NPV, negative predictive value; LR, likelihood ratio; CI, confidence interval.

high-risk groups (5,27). We next wanted to determine whether the urinary AG31 test could distinguish NMIBC patients. Of all the BC patients recruited, 1058 were classified as having stage Ta or T1 disease. The mean AG31 level of the Ta-stage patients was 13.49 times higher than that of the healthy controls in the test group (Figure 3A and Supplementary Table 2). In contrast, the mean AG31 level of the T1-stage patients was 32.11 times higher than that of the healthy controls. For the patients with NMIBC, ROC curves showed that the AUC of the AG31 levels was 0.9524 (95% CI 0.9248-0.9800), with a sensitivity of 91.04% and specificity of 91.35% in the test group compared with the patients with benign inflammatory diseases and the healthy controls (Figure 4A, and Table 3). When the NMIBC patients were compared only with the healthy controls, the AUC of the AG31 levels was 0.9574 (95% CI 0.9310-0.9838), with a sensitivity of 91.04% and specificity of 91.53% in the test group. Similar results were obtained in the validation groups (Figure 4B, and Table 3). Importantly, the diagnostic accuracy of the AG31 test was not affected by age, sex, or haematuria in BC patients (Supplementary Table 4). Altogether, these findings indicate that the urinary AG31 test is diagnostically accurate for NMIBC patients.

### The urinary AG31 test is much more sensitive and specific than the NMP22 test

NMP22, a member of the nuclear matrix protein (NMP) family, is much more prevalent in malignant urothelial cells than in normal cells. Given that NMP22 is released into urine upon cell apoptosis, NMP22 is

significantly elevated in the urine of BC patients compared to that of healthy individuals. The NMP22 test kit was approved by the U.S. Food and Drug Administration (FDA) for use in surveillance of BC. Given that the NMP22 test was used as a biomarker for the auxiliary diagnosis of BC, we applied the urinary NMP22 test and compared the results to those of the AG31 test. To further assess the diagnostic accuracy of the AG31 assay, we measured AG31 and NMP22 levels in freshly voided urine samples from BC patients (n=53) and healthy individuals (n=54). The AUC of the AG31 levels was 99.65% (95% CI: 0.9906-1.0020), with a sensitivity and specificity for the detection of BC of 90.57% and 98.15%, respectively (Supplementary Figure 4A, 4B). However, the AUC of NMP22 levels was 74.11% (95% CI: 0.6476-0.8346), and the sensitivity and specificity for the detection of BC were 47.17% and 87.04%, respectively. Discordances between the AG31 test and NMP22 test were assessed using the nonparametric McNemar test, and the *p* value was 0.01. Importantly, the predictive values and likelihood ratios for AG31 were much better than those for NMP22 (Supplementary Figure 4C). In summary, the AG31 test in urine has a better diagnostic accuracy for BC than the NMP22 test.

## DISCUSSION

We previously generated a monoclonal antibody, BCMab1, that specifically recognizes the AG31 antigen on BC tumours [17]. AG31 expression levels in tumour tissues are well correlated with the clinical severity and prognosis of BC patients. In our large-scale, multicentre

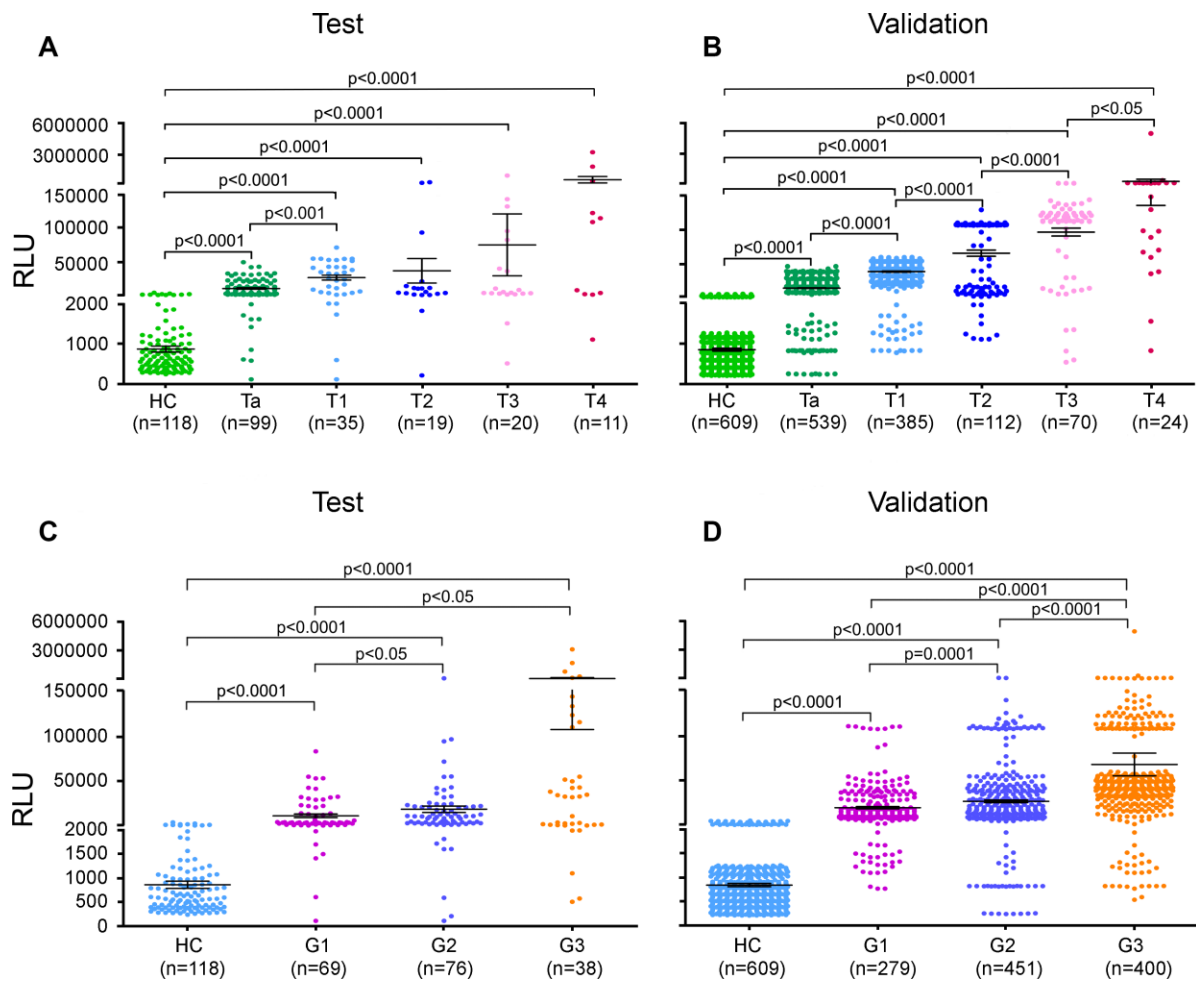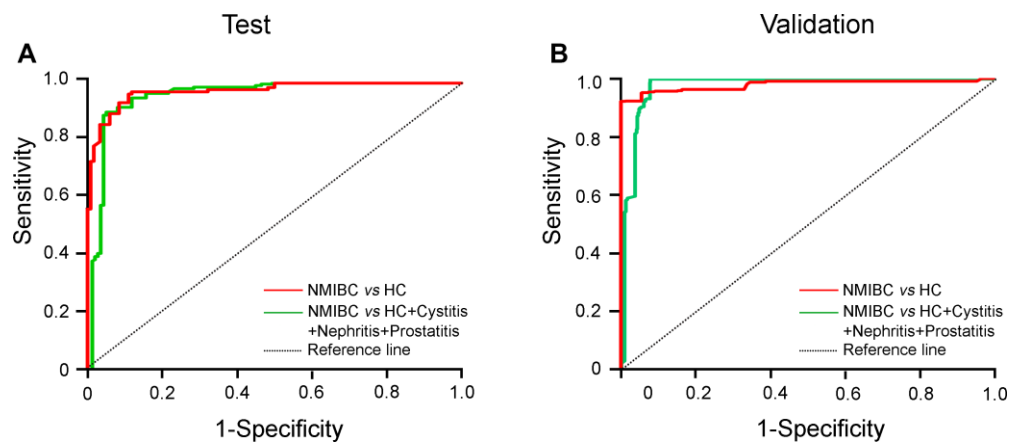

**Table 3. Results for measurement of urinary AG31 in the diagnosis of non-muscle invasive bladder cancer (NMIBC) patients.**

| Test                                       |             |             |        |        |             | Validation  |                           |             |             |        |        |             |             |
|--------------------------------------------|-------------|-------------|--------|--------|-------------|-------------|---------------------------|-------------|-------------|--------|--------|-------------|-------------|
| AUC (95% CI)                               | Sensitivity | Specificity | PPV    | NPV    | Positive LR | Negative LR | AUC (95% CI)              | Sensitivity | Specificity | PPV    | NPV    | Positive LR | Negative LR |
| NMIBC vs HC                                |             |             |        |        |             |             |                           |             |             |        |        |             |             |
| 0.9574<br>(0.9310-0.9838)                  | 0.9104      | 0.9153      | 0.9242 | 0.9000 | 10.7433     | 0.0978      | 0.9790<br>(0.9720-0.9860) | 0.9232      | 0.9442      | 0.9617 | 0.8901 | 16.5354     | 0.0814      |
| NMIBC vs HC+Cystitis+Nephritis+Prostatitis |             |             |        |        |             |             |                           |             |             |        |        |             |             |
| 0.9524<br>(0.9248-0.9800)                  | 0.9104      | 0.9135      | 0.8841 | 0.9337 | 10.5271     | 0.0980      | 0.9758<br>(0.9684-0.9833) | 0.9232      | 0.9325      | 0.9312 | 0.9246 | 13.6862     | 0.0824      |

HC, healthy control; NMIBC, non-muscle invasive bladder cancer; PPV, positive predictive value; NPV, negative predictive value; LR, likelihood ratio; CI, confidence interval.

study, we developed an ELISA kit based on BCMab1 and measured AG31 levels in the voided urine of BC patients. We show that urinary AG31 levels are substantially elevated in BC patients. The cut-off value was chosen to be 1991, and both the sensitivity and specificity of AG31 for the diagnosis of BC were over 90%. Moreover, the AG31 test could distinguish BC patients from healthy controls. Thus, urinary AG31 is a sensitive and specific biomarker for the detection of BC.

The diagnosis of BC currently depends on cystoscopy and urine cytology. Both examination methods have disadvantages and limitations. Cystoscopy is invasive, expensive, and associated with post-cystoscopy pain and/or risk of urinary infections [26, 27]. Cystoscopy is prone to missing flat lesions, such as those in patients with early Tis-stage BC, whereas urine cytology has a tendency to miss well-differentiated low-grade lesions [6, 28]. Furthermore, both methods rely on observer expertise, thus limiting their clinical applications. As such, there is an urgent need for a better, simpler, and cheaper diagnostic test in the diagnosis and surveillance of BC in patients. Over the last decade, several urine-based assays have been developed and become commercially available, including the NMP22, ImmnoCyt, and BTA stat tests [6, 29]. More recently, other associated protein biomarkers have been reported to be useful as urinary markers for the detection of BCs [7, 30, 31]. Given that these markers are not specific to BC, their specificities for the diagnosis of BC are usually low. Therefore, no markers have reached widespread use to date. Here, we utilized BCMab1, which recognizes the BC-specific membrane protein AG31, to develop an ELISA-based kit for the detection of AG31 released in urine.

Early diagnosis and vigilant surveillance of recurrences will immediately provide an ideal therapeutic strategy

to treat BC patients. Our data show that the AG31 test has high sensitivity and specificity for detecting BCs, including early-stage BCs. Among the NMIBC patients, 638 were first diagnosed with Ta-stage BC. The AG31 test can detect Ta patients with 90.9% sensitivity and 91.5% specificity compared to healthy controls. Importantly, the AG31 test can also detect low-grade tumours with over 90% sensitivity and specificity. Thus, the urinary AG31 test is an ideal examination tool for the early diagnosis of BCs.

Due to the lack of disease-specific symptoms, the diagnosis and follow-up of BC remains a major challenge. The most common presenting symptom of BC is gross painless haematuria, usually accompanied by unexplained urinary frequency, urgency, or irritative voiding symptoms [4]. These symptoms are quite similar to those of other benign urinary infections or malignancies. To date, no biomarker has been validated for the differential diagnosis of these urinary diseases. Here, we show that the urinary AG31 test solely and specifically detects BCs but not other benign urinary infections (cystitis, nephritis or prostatitis) or other urinary malignancies, such as RCC and PC. More importantly, haematuria does not influence the detection sensitivity or specificity of AG31 for BCs.

For diagnostic evaluation of the urinary AG31 test in this study, we set the cut-off value to 1991. At this cut-off point, the sensitivity and specificity for the detection of BC are 90.76% and 91.52%, respectively. If the urinary AG31 detection kit is used for routine health screening, the cut-off point can be chosen to be 6027, in which the specificity for BC diagnosis is 100% (sensitivity is 51.63%). At this level, almost no healthy individual is predicted to have a false positive result. In contrast, if the urinary AG31 detection kit is applied to monitor therapeutic response, the cut-off point can be

set to 1090, whose sensitivity for BC diagnosis is 96.74% (specificity is 77.68%). Therefore, the urinary AG31 test will serve as an ideal test tool for routine screening of BC patients.

The NMP22 test kit, approved by the FDA, is available for clinical application. Although urinary NMP22 is elevated in BC, dead and dying urothelial cells in other malignancies or inflammatory conditions can also release NMP22, thus decreasing its specificity [32, 33]. Several studies have reported that the sensitivity of NMP22 ranges from 33% to 100%, and the specificity ranges from 40% to 93% [34]. We measured NMP22 and AG31 levels in voided urine samples from BC patients and healthy controls. The sensitivity of the urinary NMP22 test is only 47.17%, which is much lower than that of the AG31 test. In conclusion, the urinary AG31 test is a sensitive and specific diagnostic test for BC that detects BCs of all stages and grades. Thus, the AG31 test will act as a promising urinary marker for the detection of BC.

## MATERIALS AND METHODS

### Primary antibodies

BCMab1 and BCMab3 monoclonal antibodies, which specifically recognize the AG31 epitope on the membranes of BC cells, were generated by our group [17]. BCMab3 was used as the capture antibody, and BCMab1 served as the detecting antibody. BCMab1 was conjugated to HRP by linkage of 2 imine-carbon (1-ethyl-3-(3-dimethylaminopropyl)-carbodiimide, EDC) as described previously [18, 19].

### Study population

From January to June 2012, we enrolled consecutive patients with BC from the Peking University People's Hospital (Beijing, China) and Cancer Institute and Hospital, Chinese Academy of Medical Science (Beijing, China) for constitute our test group. During the same time period, we also recruited consecutive patients with RCC, prostate cancer (PC), cystitis, nephritis, or prostatitis and healthy control subjects from The First Affiliated Hospital of Shenzhen University (Shenzhen, China). From July 2012 to September 2013, validation groups comprising patients with BC, RCC, PC, cystitis, nephritis, or prostatitis and healthy control subjects were recruited from The First Affiliated Hospital of Zhejiang University (Hangzhou, China), The Second Affiliated Hospital of Kunming Medical University (Kunming, China), Renji Hospital Affiliated to Shanghai Jiaotong University School of Medicine (Shanghai, China), and The First Affiliated Hospital of Jilin University (Changchun, China).

The presence of BC was confirmed by cystoscopy, together with histopathological information obtained after subsequent surgical interventions. Tumours were graded according to the WHO criteria [20, 21], and tumour stages were defined according to the tumour-node-metastasis (TNM) staging system [22]. BC patients in this study were subdivided into five stages (Ta, T1, T2, T3, and T4) and three pathological grades (G1, G2, and G3). For the purpose of this study, we classified TNM stage Tis tumours and Ta tumours including stage Ta, Ta and T1 tumours as NMIBC. The diagnoses of cystitis and nephritis were based on symptoms, physical examination and the results of the urine culture, according to the guidelines of the Infectious Diseases Society of America and the European Society for Microbiology and Infectious Diseases [23]. The diagnosis of prostatitis was based on clinical, laboratory, and imaging evidence (X-ray, ultrasonography, CT, or MRI) [24, 25]. The presence of RCC was confirmed by symptoms, imaging studies (CT or MRI), laboratory data, and renal tumour biopsy. The diagnosis of PC was based on digital rectal examination, the prostate-specific antigen test, imaging evidence (transrectal ultrasonography, CT, MRI, or ECT), prostate biopsy, and pathohistological examination of radical prostatectomy specimens, according to the clinical guidelines of the European Association of Urology. The healthy control subjects were eligible volunteers with no diseases of the urinary system, no viral hepatitis and no malignant diseases. Individuals who had a history of other solid tumours were excluded from the study.

For the test groups, we enrolled patients with BC, RCC, PC, cystitis, nephritis, or prostatitis, along with healthy control subjects, from January to June 2012. For the validation groups, patients with BC, RCC, PC, cystitis, nephritis, or prostatitis and healthy control subjects were recruited from July 2012 to September 2013. These two groups were matched for age ( $\leq 63$  years versus  $>63$  years) and sex for comparisons of AG31 values. In this study, all urine samples of the patients with BC, RCC, PC, cystitis, nephritis or prostatitis were collected before treatment. Data collection and analysis were performed by three independent researchers (YD, CL, and QZ). Approval for the study was obtained from the institutional ethics review committee of each study centre. Written informed consent was obtained from all participants, according to the committees' regulations.

### Measurement of urine samples for the AG31 test

Each well of a 96-well Nunc-Immuno microtiter plate with a MaxiSorp surface (Nalge Nunc, Penfield, NY, USA) was coated with 100  $\mu$ L of a 4  $\mu$ g/mL solution of BCMab3 in 50 mM carbonate buffer (pH 9.5), and



plates were incubated at room temperature overnight. The wells were then blocked with 120  $\mu$ L of 10 mM phosphate buffer (pH 7.4) containing 1% bovine serum albumin and 1% gelatine at 37 °C for 2 h. The plates were washed four times with PBS containing 0.05% Tween-20 and then dried at room temperature. These plates were kept at 4 °C. For the urinary AG31 test, 50  $\mu$ L of urine samples and 50  $\mu$ L of HRP-BCMab1 (1 ng/mL) were added to each well and incubated at 37 °C for 1 h. After the plates were completely washed, they were dried at room temperature. A total of 100  $\mu$ L of freshly prepared substrate solution was added to each well and stirred. Chemiluminescence intensity was measured with a chemiluminescence apparatus (Hamamatsu Photonics, Beijing, China).

### NMP22 measurement

A commercial ELISA kit (Alere Scarborough Inc., Scarborough, ME, USA) was used for auxiliary diagnosis of BC as a biomarker. According to the manufacturer's protocol for the NMP22 test, urinary NMP22 levels were measured for comparison.

### Statistical analysis

Statistical analyses were conducted with SPSS for Windows (version 16.0) and GraphPad Prism statistical software (version 5.01). The Mann-Whitney U test was used to assess differences between two independent groups, such as the levels of urinary AG31 between the patients with BC and the healthy controls. The differences in clinicopathological stages or grades were assessed using the Kruskal-Wallis H test, which was used to analyse multiple variables. Receiver operating characteristic (ROC) analysis was used to characterize marker performance, and ROC curves were constructed to assess sensitivity, specificity, and the respective areas under the curve (AUCs) with 95% confidence intervals. In the ROC curves, the true positive rate (sensitivity) is plotted against the false positive rate (1-specificity) for different cut-off points of a parameter. We chose the optimum cut-off value for diagnosis by maximizing the sum of sensitivity and specificity and minimizing the overall error (square root of the sum  $[1-\text{sensitivity}]^2 + [1-\text{specificity}]^2$ ) and by minimizing the distance of the cut-off value to the top-left corner of the ROC curve. The correlations between the levels of AG31 in urine and clinicopathological characteristics were analysed using Pearson's chi-square test ( $\chi^2$ ) or Fisher's exact test. The bivariate correlation and the Spearman correlation coefficient were used to assess the magnitude of the correlation between urinary AG31 levels and tumour stages or grades. Discordances between the AG31 test and NMP22 test were assessed using the nonparametric McNemar test. In all statistical

analyses, a *p* value of 0.05 or less was considered statistically significant.

### CONFLICTS OF INTEREST

We declare that we have no conflicts of interest.

### FUNDING

This work was supported by the National Natural Science Foundation of China (81672956, 81972390, 81672514 and 81902562), Beijing Science and Technology Project (Z181100003818003), Beijing-Tianjin-Hebei Basic Research Cooperation Project (19JCZDJC65800(Z)), Shanghai Natural Science Foundation (16ZR1420300, 18410720400, 19431907400), Renji Hospital Research Funding Projects (RJZZ18-020, PYIII-17-017, PY2018-IIC-02), Shanghai Jiao Tong University School of Medicine Research Funding Projects (TM201708) and Foundation of Shanghai Hospital Development Center (SHDC12015125).

### REFERENCES

1. Siegel R, Ma J, Zou Z, Jemal A. Cancer statistics, 2014. *CA Cancer J Clin.* 2014; 64:9–29. <https://doi.org/10.3322/caac.21208> PMID:[24399786](https://pubmed.ncbi.nlm.nih.gov/24399786/)
2. Babjuk M, Burger M, Zigeuner R, Shariat SF, van Rhijn BW, Compérat E, Sylvester RJ, Kaasinen E, Böhle A, Palou Redorta J, Rouprêt M, and European Association of Urology. EAU guidelines on non-muscle-invasive urothelial carcinoma of the bladder: update 2013. *Eur Urol.* 2013; 64:639–53. <https://doi.org/10.1016/j.eururo.2013.06.003> PMID:[23827737](https://pubmed.ncbi.nlm.nih.gov/23827737/)
3. Knowles MA, Hurst CD. Molecular biology of bladder cancer: new insights into pathogenesis and clinical diversity. *Nat Rev Cancer.* 2015; 15:25–41. <https://doi.org/10.1038/nrc3817> PMID:[25533674](https://pubmed.ncbi.nlm.nih.gov/25533674/)
4. Kaufman DS, Shipley WU, Feldman AS. Bladder cancer. *Lancet.* 2009; 374:239–49. [https://doi.org/10.1016/S0140-6736\(09\)60491-8](https://doi.org/10.1016/S0140-6736(09)60491-8) PMID:[19520422](https://pubmed.ncbi.nlm.nih.gov/19520422/)
5. Babjuk M. What are the limitations of endoscopic management of urothelial carcinoma of the upper urinary tract? *Eur Urol.* 2011; 60:961–63. <https://doi.org/10.1016/j.eururo.2011.08.021> PMID:[21862204](https://pubmed.ncbi.nlm.nih.gov/21862204/)
6. Xylinas E, Kluth LA, Lotan Y, Daneshmand S, Rieken M, Karakiewicz PI, Shariat SF. Blood- and tissue-based biomarkers for prediction of outcomes in

- urothelial carcinoma of the bladder. *Urol Oncol*. 2014; 32:230–42.  
<https://doi.org/10.1016/j.urolonc.2013.06.009>  
 PMID:24332648
7. Kandimalla R, Masius R, Beukers W, Bangma CH, Orntoft TF, Dyrskjot L, van Leeuwen N, Lingsma H, van Tilborg AA, Zwarthoff EC. A 3-plex methylation assay combined with the FGFR3 mutation assay sensitively detects recurrent bladder cancer in voided urine. *Clin Cancer Res*. 2013; 19:4760–69.  
<https://doi.org/10.1158/1078-0432.CCR-12-3276>  
 PMID:23842048
  8. Kinde I, Munari E, Faraj SF, Hruban RH, Schoenberg M, Bivalacqua T, Allaf M, Springer S, Wang Y, Diaz LA Jr, Kinzler KW, Vogelstein B, Papadopoulos N, Netto GJ. TERT promoter mutations occur early in urothelial neoplasia and are biomarkers of early disease and disease recurrence in urine. *Cancer Res*. 2013; 73:7162–67.  
<https://doi.org/10.1158/0008-5472.CAN-13-2498>  
 PMID:24121487
  9. Margulis V, Lotan Y, Karakiewicz PI, Fradet Y, Ashfaq R, Capitanio U, Montorsi F, Bastian PJ, Nielsen ME, Müller SC, Rigaud J, Heukamp LC, Netto G, et al. Multi-institutional validation of the predictive value of ki-67 labeling index in patients with urinary bladder cancer. *J Natl Cancer Inst*. 2009; 101:114–19.  
<https://doi.org/10.1093/jnci/djn451>  
 PMID:19141773
  10. Stoeber K, Swinn R, Prevost AT, de Clive-Lowe P, Halsall I, Dilworth SM, Marr J, Turner WH, Bullock N, Doble A, Hales CN, Williams GH. Diagnosis of genito-urinary tract cancer by detection of minichromosome maintenance 5 protein in urine sediments. *J Natl Cancer Inst*. 2002; 94:1071–79.  
<https://doi.org/10.1093/jnci/94.14.1071>  
 PMID:12122098
  11. Winograd-Katz SE, Fässler R, Geiger B, Legate KR. The integrin adhesome: from genes and proteins to human disease. *Nat Rev Mol Cell Biol*. 2014; 15:273–88.  
<https://doi.org/10.1038/nrm3769>  
 PMID:24651544
  12. Sachs N, Sonnenberg A. Cell-matrix adhesion of podocytes in physiology and disease. *Nat Rev Nephrol*. 2013; 9:200–10.  
<https://doi.org/10.1038/nrneph.2012.291>  
 PMID:23338211
  13. Liu Y, Chattopadhyay N, Qin S, Szekeres C, Vasylyeva T, Mahoney ZX, Taglienti M, Bates CM, Chapman HA, Miner JH, Kreidberg JA. Coordinate integrin and c-met signaling regulate Wnt gene expression during epithelial morphogenesis. *Development*. 2009; 136:843–53.  
<https://doi.org/10.1242/dev.027805>  
 PMID:19176588
  14. Lityńska A, Przybyło M, Ksiazek D, Laidler P. Differences of alpha3beta1 integrin glycans from different human bladder cell lines. *Acta Biochim Pol*. 2000; 47:427–34.  
[https://doi.org/10.18388/abp.2000\\_4022](https://doi.org/10.18388/abp.2000_4022)  
 PMID:11051207
  15. Brooks CL, Schietinger A, Borisova SN, Kufer P, Okon M, Hirama T, Mackenzie CR, Wang LX, Schreiber H, Evans SV. Antibody recognition of a unique tumor-specific glycopeptide antigen. *Proc Natl Acad Sci USA*. 2010; 107:10056–61.  
<https://doi.org/10.1073/pnas.0915176107>  
 PMID:20479270
  16. Park JH, Nishidate T, Kijima K, Ohashi T, Takegawa K, Fujikane T, Hirata K, Nakamura Y, Katagiri T. Critical roles of mucin 1 glycosylation by transactivated polypeptide N-acetylgalactosaminyltransferase 6 in mammary carcinogenesis. *Cancer Res*. 2010; 70:2759–69.  
<https://doi.org/10.1158/0008-5472.CAN-09-3911>  
 PMID:20215525
  17. Li C, Yang Z, Du Y, Tang H, Chen J, Hu D, Fan Z. BCMab1, a monoclonal antibody against aberrantly glycosylated integrin  $\alpha 3 \beta 1$ , has potent antitumor activity of bladder cancer in vivo. *Clin Cancer Res*. 2014; 20:4001–13.  
<https://doi.org/10.1158/1078-0432.CCR-13-3397>  
 PMID:25002124
  18. Watanabe H, Satake A, Kido Y, Tsuji A. Monoclonal-based enzyme-linked immunosorbent assay and immunochromatographic assay for enrofloxacin in biological matrices. *Analyst*. 2002; 127:98–103.  
<https://doi.org/10.1039/b109427k> PMID:11827405
  19. Yu F, Yu S, Yu L, Li Y, Wu Y, Zhang H, Qu L, Harrington Pde B. Determination of residual enrofloxacin in food samples by a sensitive method of chemiluminescence enzyme immunoassay. *Food Chem*. 2014; 149:71–75.  
<https://doi.org/10.1016/j.foodchem.2013.10.024>  
 PMID:24295678
  20. Mostofi FK, Sobin LH, Torloni H, and World Health Organization. Histological typing of urinary bladder tumours. F. K. Mostofi in collaboration with L. H. Sobin, H. Torloni and pathologists in fourteen countries. Geneva: World Health Organization; 1973.  
<https://apps.who.int/iris/handle/10665/41533>
  21. Chen Z, Ding W, Xu K, Tan J, Sun C, Gou Y, Tong S, Xia G, Fang Z, Ding Q. The 1973 WHO classification is more suitable than the 2004 WHO classification for predicting prognosis in non-muscle-invasive bladder cancer. *PLoS One*. 2012; 7:e47199.  
<https://doi.org/10.1371/journal.pone.0047199>

PMID:[23082147](#)

22. American Joint Committee on Cancer. AJCC cancer staging handbook: from the AJCC cancer staging manual. 6th ed. New York: Springer; 2002.
23. Gupta K, Hooton TM, Naber KG, Wullt B, Colgan R, Miller LG, Moran GJ, Nicolle LE, Raz R, Schaeffer AJ, Soper DE, and Infectious Diseases Society of America, and European Society for Microbiology and Infectious Diseases. International clinical practice guidelines for the treatment of acute uncomplicated cystitis and pyelonephritis in women: a 2010 update by the Infectious Diseases Society of America and the European Society for Microbiology and Infectious Diseases. *Clin Infect Dis*. 2011; 52:e103–20.  
<https://doi.org/10.1093/cid/ciq257>  
PMID:[21292654](#)
24. Schaeffer AJ, Knauss JS, Landis JR, Probert KJ, Alexander RB, Litwin MS, Nickel JC, O’Leary MP, Nadler RB, Pontari MA, Shoskes DA, Zeitlin SI, Fowler JE Jr, et al, and Chronic Prostatitis Collaborative Research Network Study Group. Leukocyte and bacterial counts do not correlate with severity of symptoms in men with chronic prostatitis: the national institutes of health chronic prostatitis cohort study. *J Urol*. 2002; 168:1048–53.  
<https://doi.org/10.1097/01.ju.0000024762.69326.df>  
PMID:[12187220](#)
25. Müller A, Mulhall JP. Sexual dysfunction in the patient with prostatitis. *Curr Opin Urol*. 2005; 15:404–09.  
<https://doi.org/10.1097/01.mou.0000186847.25259.28>  
PMID:[16205492](#)
26. Cheung G, Sahai A, Billia M, Dasgupta P, Khan MS. Recent advances in the diagnosis and treatment of bladder cancer. *BMC Med*. 2013; 11:13.  
<https://doi.org/10.1186/1741-7015-11-13>  
PMID:[23327481](#)
27. Mitra AP, Cote RJ. Molecular pathogenesis and diagnostics of bladder cancer. *Annu Rev Pathol*. 2009; 4:251–85.  
<https://doi.org/10.1146/annurev.pathol.4.110807.092230> PMID:[18840072](#)
28. Tilki D, Burger M, Dalbagni G, Grossman HB, Hakenberg OW, Palou J, Reich O, Rouprêt M, Shariat SF, Zlotta AR. Urine markers for detection and surveillance of non-muscle-invasive bladder cancer. *Eur Urol*. 2011; 60:484–92.  
<https://doi.org/10.1016/j.eururo.2011.05.053>  
PMID:[21684071](#)
29. Yossepowitch O, Herr HW, Donat SM. Use of urinary biomarkers for bladder cancer surveillance: patient perspectives. *J Urol*. 2007; 177:1277–82.  
<https://doi.org/10.1016/j.juro.2006.11.066>  
PMID:[17382711](#)
30. Ardelt P, Grünemay N, Strehl A, Jilg C, Miernik A, Kneitz B, Butt E. LASP-1, a novel urinary marker for detection of bladder cancer. *Urol Oncol*. 2013; 31:1591–98.  
<https://doi.org/10.1016/j.urolonc.2012.02.002>  
PMID:[22481019](#)
31. Kelly JD, Dudderidge TJ, Wollenschlaeger A, Okoturo O, Burling K, Tulloch F, Halsall I, Prevost T, Prevost AT, Vasconcelos JC, Robson W, Leung HY, Vasdev N, et al. Bladder cancer diagnosis and identification of clinically significant disease by combined urinary detection of Mcm5 and nuclear matrix protein 22. *PLoS One*. 2012; 7:e40305.  
<https://doi.org/10.1371/journal.pone.0040305>  
PMID:[22792272](#)
32. Shariat SF, Karakiewicz PI, Palapattu GS, Lotan Y, Rogers CG, Amiel GE, Vazina A, Gupta A, Bastian PJ, Sagalowsky AI, Schoenberg MP, Lerner SP. Outcomes of radical cystectomy for transitional cell carcinoma of the bladder: a contemporary series from the bladder cancer research consortium. *J Urol*. 2006; 176:2414–22.  
<https://doi.org/10.1016/j.juro.2006.08.004>  
PMID:[17085118](#)
33. Barbieri CE, Cha EK, Chromecki TF, Dunning A, Lotan Y, Svatek RS, Scherr DS, Karakiewicz PI, Sun M, Mazumdar M, Shariat SF. Decision curve analysis assessing the clinical benefit of NMP22 in the detection of bladder cancer: secondary analysis of a prospective trial. *BJU Int*. 2012; 109:685–90.  
<https://doi.org/10.1111/j.1464-410X.2011.010419.x>  
PMID:[21851550](#)
34. Mowatt G, Zhu S, Kilonzo M, Boachie C, Fraser C, Griffiths TR, N’Dow J, Nabi G, Cook J, Vale L. Systematic review of the clinical effectiveness and cost-effectiveness of photodynamic diagnosis and urine biomarkers (FISH, ImmunoCyt, NMP22) and cytology for the detection and follow-up of bladder cancer. *Health Technol Assess*. 2010; 14:1–331.  
<https://doi.org/10.3310/hta14040>  
PMID:[20082749](#)

**SUPPLEMENTARY MATERIALS**

**Supplementary Figures**

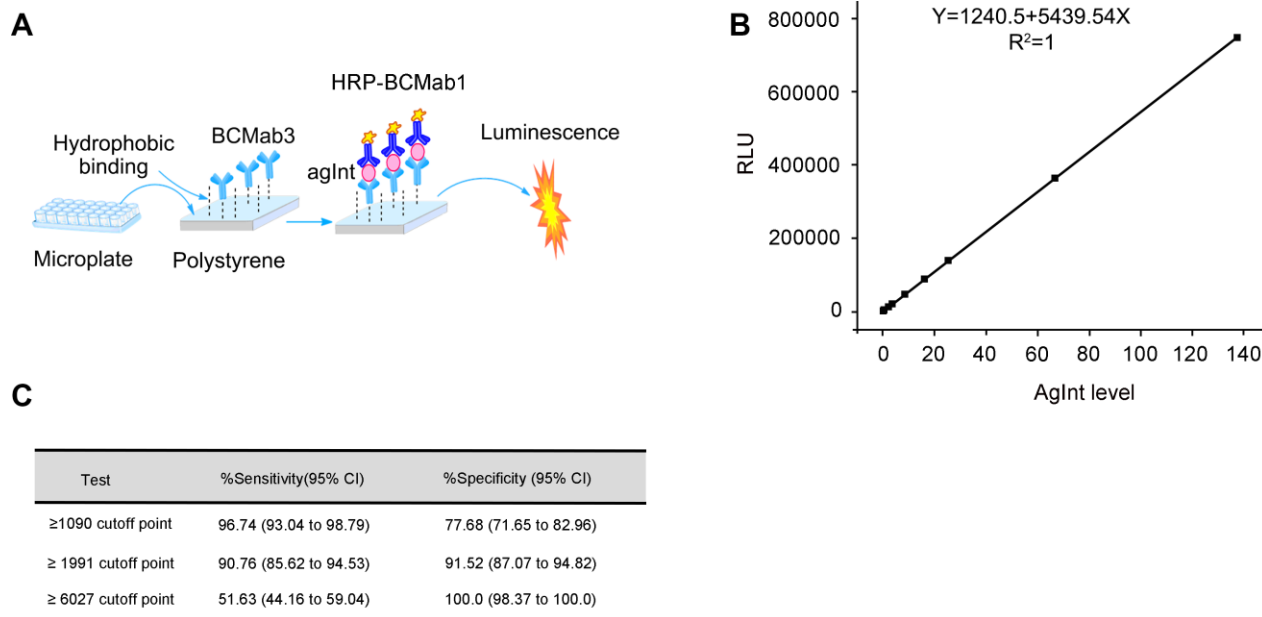

**Supplementary Figure 1. Development of the urinary AG31 test kit.** (A) Strategy of the ELISA-based AG31 test assay. (B) Calibration curve of the AG31 test with the standards. AG31: aberrantly glycosylated integrin  $\alpha3\beta1$ ; BCMab1: one monoclonal antibody against AG31; BCMab3: another monoclonal antibody against AG31; HRP: horseradish peroxidase; RLU: relative light unit. (C) The optimum cut-off value was set to 1991.

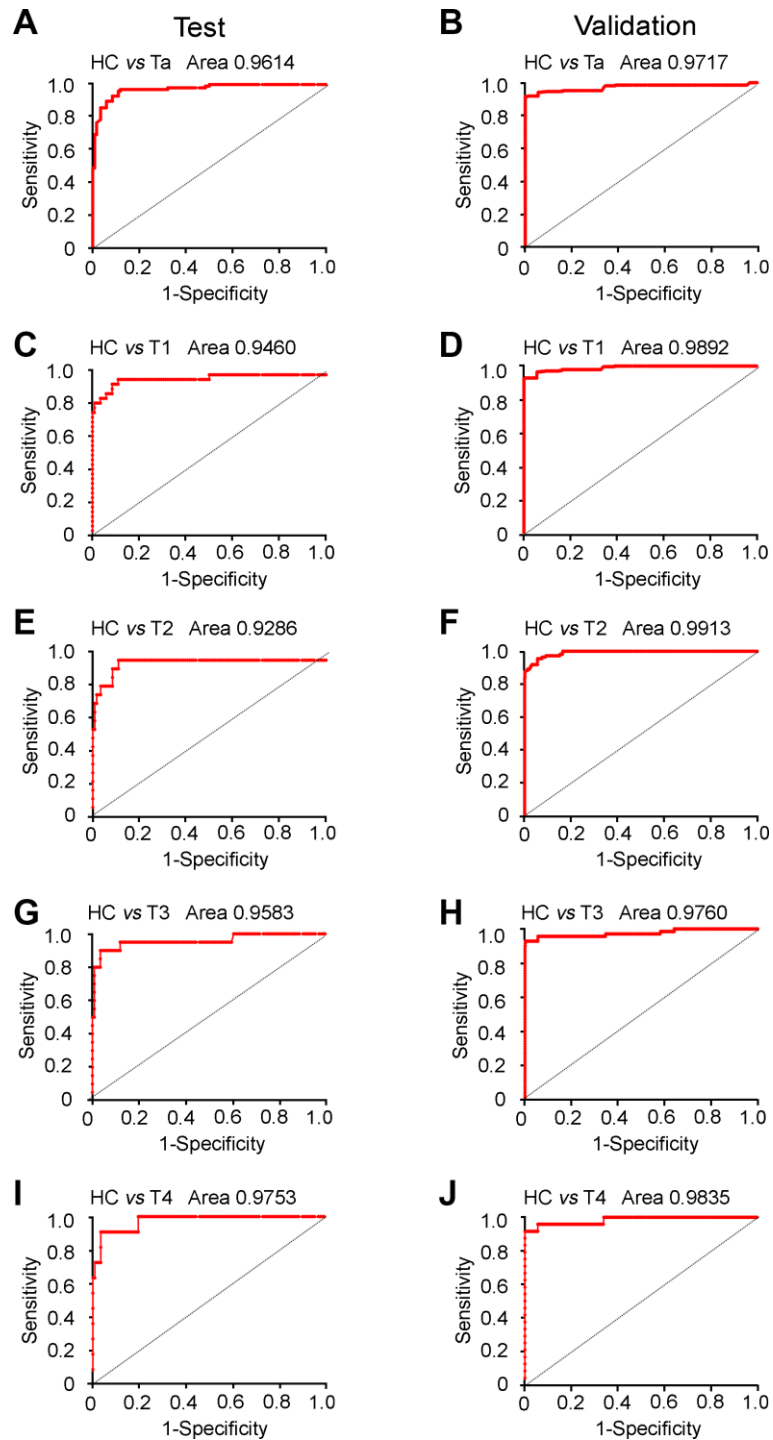

**Supplementary Figure 2. Diagnostic capabilities of urinary AG31 test in discriminating bladder cancer patients with different stages versus healthy controls.** (A, B) Receiver operating characteristic (ROC) curve for patients with Ta stage versus healthy controls in the test group (A), and in the validation group (B). (C, D) ROC curve for patients with T1 stage versus healthy controls in the test group (C), and in the validation group (D). (E, F) ROC curve for patients with T2 stage versus healthy controls in the test group (E), and in the validation group (F). (G, H) ROC curve for patients with T3 stage versus healthy controls in the test group (G), and in the validation group (H). (I, J) ROC curve for patients with T4 stage versus healthy controls in the test group (I), and in the validation group (J). A jagged curve denotes a ROC curve; a diagonal line represents a reference line. HC, healthy controls.

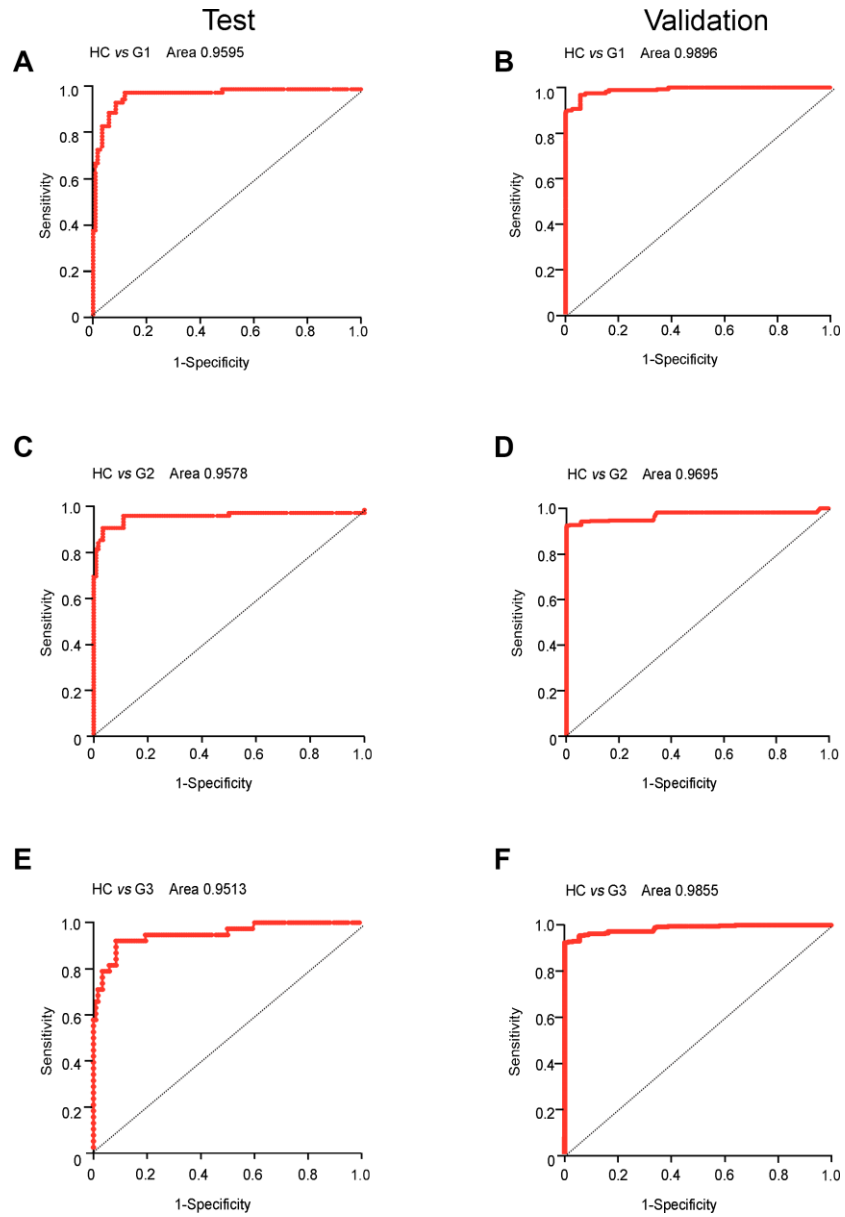

**Supplementary Figure 3. Diagnostic capabilities of urinary AG31 test in discriminating bladder cancer patients with different grades versus healthy controls.** (A, B) Receiver operating characteristics (ROC) curve for BC patients with G1 versus healthy controls in the test group (A), and in the validation group (B). (C, D) ROC curve for BC patients with G2 versus healthy controls in the test group (C), and in the validation group (D). (E, F) ROC curve for BC patients with G3 versus healthy controls in the test group (E), and in the validation group (F). A jagged curve denotes a ROC curve; a diagonal line represents a reference line. HC, healthy controls.

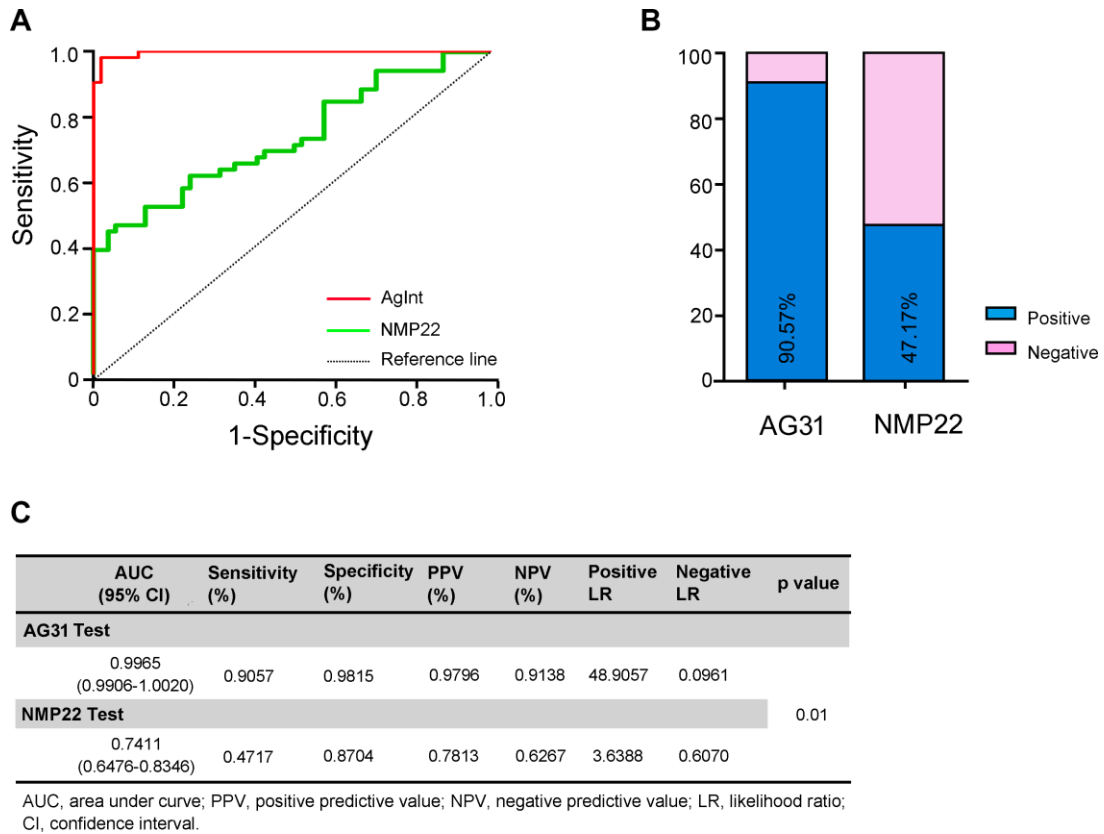

**Supplementary Figure 4. The urinary AG31 test is more sensitive and specific than the NMP22 test.** (A) ROC curves for AG31 and NMP22 for the patients with bladder cancer versus healthy controls in the test group. Jagged curves denote ROC curves; the diagonal line represents a reference line. (B) The rates of positive results for AG31 or NMP22 in all tested bladder cancer patients in the test group. (C) Comparison of the AG31 test with NMP22 test for the diagnosis of bladder cancer.

## Supplementary Tables

**Supplementary Table 1A. Age distribution of patients with renal cell carcinoma (RCC) in the test and validation groups.**

| Variable    | Test (n=23) |                | Validation (n=134) |                | p value |
|-------------|-------------|----------------|--------------------|----------------|---------|
|             | No.         | Percentage (%) | No.                | Percentage (%) |         |
| Age (years) |             |                |                    |                |         |
|             | ≤65         | 14             | 60.9               | 66             | 49.3    |
|             | >65         | 9              | 39.1               | 68             | 50.7    |

**Supplementary Table 1B. Age distribution of patients with prostate cancer (PC) in the test and validation groups.**

| Variable    | Test (n=16) |                | Validation (n=119) |                | p value |
|-------------|-------------|----------------|--------------------|----------------|---------|
|             | No.         | Percentage (%) | No.                | Percentage (%) |         |
| Age (years) |             |                |                    |                |         |
|             | ≤65         | 12             | 75.0               | 65             | 54.6    |
|             | >65         | 4              | 25.0               | 54             | 45.4    |

**Supplementary Table 1C. Age distribution of patients with cystitis in the test and validation groups.**

| Variable    | Test (n=21) |                | Validation (n=107) |                | p value |
|-------------|-------------|----------------|--------------------|----------------|---------|
|             | No.         | Percentage (%) | No.                | Percentage (%) |         |
| Age (years) |             |                |                    |                |         |
|             | ≤65         | 9              | 42.9               | 56             | 52.3    |
|             | >65         | 12             | 57.1               | 51             | 47.7    |

**Supplementary Table 1D. Age distribution of patients with nephritis in the test and validation groups.**

| Variable    | Test (n=25) |                | Validation (n=107) |                | p value |
|-------------|-------------|----------------|--------------------|----------------|---------|
|             | No.         | Percentage (%) | No.                | Percentage (%) |         |
| Age (years) |             |                |                    |                |         |
|             | ≤47         | 12             | 48.0               | 56             | 52.3    |
|             | >47         | 13             | 52.0               | 51             | 47.7    |

**Supplementary Table 1E. Age distribution of patients with prostatitis in the test and validation groups.**

| Variable    | Test (n=21) |                | Validation (n=111) |                | p value |
|-------------|-------------|----------------|--------------------|----------------|---------|
|             | No.         | Percentage (%) | No.                | Percentage (%) |         |
| Age (years) |             |                |                    |                |         |
|             | ≤57         | 10             | 47.6               | 59             | 53.2    |
|             | >57         | 11             | 52.4               | 52             | 46.8    |



**Supplementary Table 2. Urinary AG31 levels in different measurement groups in both test and validation groups.**

| Group       | Test |                         |                     |        |         | Validation |                          |                    |        |         |
|-------------|------|-------------------------|---------------------|--------|---------|------------|--------------------------|--------------------|--------|---------|
|             | No.  | Median (IQR)            | Mean (SD)           | times  | p value | No.        | Median (IQR)             | Mean (SD)          | times  | p value |
| HC          | 118  | 576 (378-988)           | 859 (819)           |        |         | 609        | 660 (440-909)            | 840 (858)          |        |         |
| BC          | 184  | 6525<br>(3600-26585)    | 54768<br>(276559)   |        |         | 1130       | 23342<br>(11459-45637)   | 40281<br>(150259)  |        |         |
| RCC         | 23   | 648 (630-1440)          | 1011 (703)          |        |         | 134        | 667 (601-902)            | 916 (664)          |        |         |
| PC          | 16   | 875 (586-1054)          | 925 (427)           |        |         | 119        | 844 (611-1240)           | 1031 (777)         |        |         |
| Cystitis    | 21   | 885 (715-1201)          | 1070 (652)          |        |         | 107        | 863 (634-1375)           | 1064 (846)         |        |         |
| Nephritis   | 25   | 663 (569-1022)          | 995 (1048)          |        |         | 107        | 755 (560-990)            | 886 (494)          |        |         |
| Prostatitis | 21   | 955 (866-1109)          | 1234 (1114)         |        |         | 111        | 914 (702-1045)           | 998 (656)          |        |         |
| Ta          | 99   | 5409<br>(3487-19089)    | 11584<br>(11522)    | 13.49  |         | 539.       | 12262<br>(10593-17900)   | 15250<br>(9247)    | 18.15  |         |
| T1          | 35   | 26860<br>(5326-43584)   | 27585<br>(21465)    | 32.11  |         | 385.       | 42489<br>(32469-50096)   | 39146<br>(14676)   | 46.60  |         |
| T2          | 19   | 6609<br>(2814-15289)    | 37709<br>(78583)    | 43.90  |         | 112.       | 106507<br>(10817-107541) | 65989<br>(47413)   | 78.56  |         |
| T3          | 20   | 5933<br>(4183-72474)    | 75671<br>(203268)   | 88.09  |         | 70.        | 114721<br>(84494-124044) | 96689<br>(47844)   | 115.11 |         |
| T4          | 11   | 109344<br>(3340-411814) | 521252<br>(1022000) | 606.81 |         | 24.        | 155164<br>(68320-189943) | 336146<br>(982861) | 400.17 |         |
| G1          | 69   | 5115<br>(3278-15313)    | 12667<br>(16439)    | 14.75  |         | 279        | 12153<br>(10437-27527)   | 20825<br>(20877)   | 24.79  |         |
| G2          | 76   | 11611<br>(4740-22854)   | 19828<br>(30457)    | 23.08  |         | 451        | 16621<br>(11065-35386)   | 27772<br>(29740)   | 33.06  |         |
| G3          | 38   | 33621<br>(2845-110717)  | 202477<br>(589592)  | 235.71 |         | 400        | 44916<br>(32455-56397)   | 67956<br>(247740)  | 80.90  |         |

HC, healthy controls; BC, bladder cancer; RCC, renal cell carcinoma; PC, prostate cancer; IQR, interquartile range; SD, standard deviation.

**Supplementary Table 3. Results for measurement of urinary AG31 in the diagnosis of bladder cancer with different stages and grades *versus* healthy controls.**

|          | Test                          |             |             |        |        | Validation     |                |                               |             |             |        |        |                |                |
|----------|-------------------------------|-------------|-------------|--------|--------|----------------|----------------|-------------------------------|-------------|-------------|--------|--------|----------------|----------------|
|          | AUC<br>(95% CI)               | Sensitivity | Specificity | PPV    | NPV    | Positive<br>LR | Negative<br>LR | AUC<br>(95% CI)               | Sensitivity | Specificity | PPV    | NPV    | Positive<br>LR | Negative<br>LR |
| HC vs Ta | 0.9614<br>(0.9341-<br>0.9887) | 0.9091      | 0.9153      | 0.9000 | 0.9231 | 10.7273        | 0.0993         | 0.9717<br>(0.9606-<br>0.9829) | 0.9184      | 0.9442      | 0.9357 | 0.9289 | 16.4496        | 0.0865         |
| HC vs T1 | 0.9460<br>(0.8846-<br>1.0070) | 0.9143      | 0.9153      | 0.7619 | 0.9730 | 10.7886        | 0.0937         | 0.9892<br>(0.9838-<br>0.9945) | 0.9299      | 0.9442      | 0.9133 | 0.9551 | 16.6556        | 0.0743         |
| HC vs T2 | 0.9286<br>(0.8283-<br>1.0290) | 0.8947      | 0.9153      | 0.6296 | 0.9818 | 10.5579        | 0.1150         | 0.9913<br>(0.9855-<br>0.9971) | 0.9196      | 0.9442      | 0.7518 | 0.9846 | 16.4724        | 0.0851         |
| HC vs T3 | 0.9583<br>(0.9000-<br>1.0170) | 0.9500      | 0.9153      | 0.6552 | 0.9908 | 11.2100        | 0.0546         | 0.9760<br>(0.9504-<br>1.0020) | 0.9286      | 0.9442      | 0.6566 | 0.9914 | 16.6324        | 0.0757         |
| HC vs T4 | 0.9753<br>(0.9401-<br>1.0110) | 0.9091      | 0.9153      | 0.5000 | 0.9908 | 10.7273        | 0.0993         | 0.9835<br>(0.9561-<br>1.0110) | 0.9167      | 0.9442      | 0.3929 | 0.9965 | 16.4191        | 0.0883         |
| HC vs G1 | 0.9595<br>(0.9254-<br>0.9936) | 0.9130      | 0.9153      | 0.8630 | 0.9474 | 10.7739        | 0.0950         | 0.9896<br>(0.9840-<br>0.9951) | 0.9068      | 0.9442      | 0.8815 | 0.9567 | 16.2426        | 0.0987         |
| HC vs G2 | 0.9578<br>(0.9192-<br>0.9964) | 0.9079      | 0.9153      | 0.8734 | 0.9391 | 10.7132        | 0.1006         | 0.9695<br>(0.9565-<br>0.9826) | 0.9268      | 0.9442      | 0.9248 | 0.9457 | 16.6011        | 0.0775         |
| HC vs G3 | 0.9513<br>(0.9093-<br>0.9933) | 0.9211      | 0.9153      | 0.7778 | 0.9730 | 10.8684        | 0.0863         | 0.9855<br>(0.9786-<br>0.9924) | 0.9300      | 0.9442      | 0.9163 | 0.9536 | 16.6579        | 0.0741         |

HC, healthy control; AUC, area under curve; PPV, positive predictive value; NPV, negative predictive value; LR, likelihood ratio; CI, confidence interval.

**Supplementary Table 4. Correlation between AG31 levels and clinicopathologic characteristics of bladder cancer patients in both test and validation groups.**

| Variable           | Test (n=184)             |                          | Validation (n=1130)      |                          |
|--------------------|--------------------------|--------------------------|--------------------------|--------------------------|
|                    | Negative<br>(Percentage) | Positive<br>(Percentage) | Negative<br>(Percentage) | Positive<br>(Percentage) |
|                    | 17                       | 167                      | 87                       | 1043                     |
| Age (years)        |                          |                          |                          |                          |
| ≤63                | 9 (9.78%)                | 83 (90.22%)              | 31 (6.33%)               | 459 (93.67%)             |
| >63                | 7 (8.14%)                | 79 (91.86%)              | 41 (6.73%)               | 568 (93.27%)             |
| Missing            | 1                        | 5                        | 15                       | 16                       |
| Gender             |                          |                          |                          |                          |
| Female             | 4 (12.50%)               | 28 (87.50%)              | 13 (5.56%)               | 221 (94.44%)             |
| Male               | 12 (8.28%)               | 133 (91.72%)             | 61 (7.03%)               | 807 (92.97%)             |
| Missing            | 1                        | 6                        | 13                       | 15                       |
| Pathological stage |                          |                          |                          |                          |
| Ta+T1              | 12 (8.96%)               | 122 (91.04%)             | 71 (7.68%)               | 853 (92.32%)             |
| T2+T3+T4           | 5 (10.00%)               | 45 (90.00%)              | 16 (7.77%)               | 190 (92.23%)             |
| Pathological grade |                          |                          |                          |                          |
| G1                 | 6 (8.70%)                | 63 (91.30%)              | 26 (9.32%)               | 253 (90.68%)             |
| G2+G3              | 10 (8.77%)               | 104 (91.23%)             | 61 (7.17%)               | 790 (92.83%)             |
| Missing            | 1                        |                          |                          |                          |
| Hematuria          |                          |                          |                          |                          |
| Visible            | 4 (21.05%)               | 15 (78.95%)              | 26 (7.22%)               | 334 (92.78%)             |
| Non-visible        | 13 (7.88%)               | 152 (92.12%)             | 61 (7.92%)               | 709 (92.08%)             |
| Tumor recurrence   |                          |                          |                          |                          |
| Yes                | 2 (7.41%)                | 25 (92.59%)              | 23 (12.23%)              | 165 (87.77%)             |
| No                 | 13 (9.70%)               | 121 (90.30%)             | 44 (4.96%)               | 843 (95.04%)             |
| Missing            | 2                        | 21                       | 20                       | 35                       |

\*: Fisher exact test. Chi-square tests for all the other analysis.
