# Supplementary material for: Aberrantly glycosylated integrin α3β1 is a unique urinary biomarker for the diagnosis of bladder cancer
Source: publisher site journal article supplement (doi:10.18632/aging.103297), 2020-06-13
Supplement: Supplementary file [file aging-v12i11-103297-supplementary-material-SD2.pdf]

## SUPPLEMENTARY TABLES

**Supplementary Table 1A. Age distribution of patients with renal cell carcinoma (RCC) in the test and validation groups.**

| Variable    | Test (n=23) |                | Validation (n=134) |                | p value |       |
|-------------|-------------|----------------|--------------------|----------------|---------|-------|
|             | No.         | Percentage (%) | No.                | Percentage (%) |         |       |
| Age (years) |             |                |                    |                |         |       |
|             | ≤65         | 14             | 60.9               | 66             | 49.3    | 0.303 |
|             | >65         | 9              | 39.1               | 68             | 50.7    |       |

**Supplementary Table 1B. Age distribution of patients with prostate cancer (PC) in the test and validation groups.**

| Variable    | Test (n=16) |                | Validation (n=119) |                | p value |       |
|-------------|-------------|----------------|--------------------|----------------|---------|-------|
|             | No.         | Percentage (%) | No.                | Percentage (%) |         |       |
| Age (years) |             |                |                    |                |         |       |
|             | ≤65         | 12             | 75.0               | 65             | 54.6    | 0.122 |
|             | >65         | 4              | 25.0               | 54             | 45.4    |       |

**Supplementary Table 1C. Age distribution of patients with cystitis in the test and validation groups.**

| Variable    | Test (n=21) |                | Validation (n=107) |                | p value |       |
|-------------|-------------|----------------|--------------------|----------------|---------|-------|
|             | No.         | Percentage (%) | No.                | Percentage (%) |         |       |
| Age (years) |             |                |                    |                |         |       |
|             | ≤65         | 9              | 42.9               | 56             | 52.3    | 0.427 |
|             | >65         | 12             | 57.1               | 51             | 47.7    |       |

**Supplementary Table 1D. Age distribution of patients with nephritis in the test and validation groups.**

| Variable    | Test (n=25) |                | Validation (n=107) |                | p value |       |
|-------------|-------------|----------------|--------------------|----------------|---------|-------|
|             | No.         | Percentage (%) | No.                | Percentage (%) |         |       |
| Age (years) |             |                |                    |                |         |       |
|             | ≤47         | 12             | 48.0               | 56             | 52.3    | 0.696 |
|             | >47         | 13             | 52.0               | 51             | 47.7    |       |

**Supplementary Table 1E. Age distribution of patients with prostatitis in the test and validation groups.**

| Variable    | Test (n=21) |                | Validation (n=111) |                | p value |       |
|-------------|-------------|----------------|--------------------|----------------|---------|-------|
|             | No.         | Percentage (%) | No.                | Percentage (%) |         |       |
| Age (years) |             |                |                    |                |         |       |
|             | ≤57         | 10             | 47.6               | 59             | 53.2    | 0.642 |
|             | >57         | 11             | 52.4               | 52             | 46.8    |       |

**Supplementary Table 2. Urinary AG31 levels in different measurement groups in both test and validation groups.**

| Group       | Test |                         |                     |        |         | Validation |                          |                    |        |         |
|-------------|------|-------------------------|---------------------|--------|---------|------------|--------------------------|--------------------|--------|---------|
|             | No.  | Median (IQR)            | Mean (SD)           | times  | p value | No.        | Median (IQR)             | Mean (SD)          | times  | p value |
| HC          | 118  | 576 (378-988)           | 859 (819)           |        |         | 609        | 660 (440-909)            | 840 (858)          |        |         |
| BC          | 184  | 6525<br>(3600-26585)    | 54768<br>(276559)   |        |         | 1130       | 23342<br>(11459-45637)   | 40281<br>(150259)  |        |         |
| RCC         | 23   | 648 (630-1440)          | 1011 (703)          |        |         | 134        | 667 (601-902)            | 916 (664)          |        |         |
| PC          | 16   | 875 (586-1054)          | 925 (427)           |        |         | 119        | 844 (611-1240)           | 1031 (777)         |        |         |
| Cystitis    | 21   | 885 (715-1201)          | 1070 (652)          |        |         | 107        | 863 (634-1375)           | 1064 (846)         |        |         |
| Nephritis   | 25   | 663 (569-1022)          | 995 (1048)          |        |         | 107        | 755 (560-990)            | 886 (494)          |        |         |
| Prostatitis | 21   | 955 (866-1109)          | 1234 (1114)         |        |         | 111        | 914 (702-1045)           | 998 (656)          |        |         |
| Ta          | 99   | 5409<br>(3487-19089)    | 11584<br>(11522)    | 13.49  |         | 539.       | 12262<br>(10593-17900)   | 15250<br>(9247)    | 18.15  |         |
| T1          | 35   | 26860<br>(5326-43584)   | 27585<br>(21465)    | 32.11  |         | 385.       | 42489<br>(32469-50096)   | 39146<br>(14676)   | 46.60  |         |
| T2          | 19   | 6609<br>(2814-15289)    | 37709<br>(78583)    | 43.90  | 0.008   | 112.       | 106507<br>(10817-107541) | 65989<br>(47413)   | 78.56  | <0.001  |
| T3          | 20   | 5933<br>(4183-72474)    | 75671<br>(203268)   | 88.09  |         | 70.        | 114721<br>(84494-124044) | 96689<br>(47844)   | 115.11 |         |
| T4          | 11   | 109344<br>(3340-411814) | 521252<br>(1022000) | 606.81 |         | 24.        | 155164<br>(68320-189943) | 336146<br>(982861) | 400.17 |         |
| G1          | 69   | 5115<br>(3278-15313)    | 12667<br>(16439)    | 14.75  |         | 279        | 12153<br>(10437-27527)   | 20825<br>(20877)   | 24.79  |         |
| G2          | 76   | 11611<br>(4740-22854)   | 19828<br>(30457)    | 23.08  | 0.010   | 451        | 16621<br>(11065-35386)   | 27772<br>(29740)   | 33.06  | <0.001  |
| G3          | 38   | 33621<br>(2845-110717)  | 202477<br>(589592)  | 235.71 |         | 400        | 44916<br>(32455-56397)   | 67956<br>(247740)  | 80.90  |         |

HC, healthy controls; BC, bladder cancer; RCC, renal cell carcinoma; PC, prostate cancer; IQR, interquartile range; SD, standard definition.

**Supplementary Table 3. Results for measurement of urinary AG31 in the diagnosis of bladder cancer with different stages and grades versus healthy controls.**

|          | Test                          |             |             |        |        | Validation     |                |                               |             |             |        |        |                |                |
|----------|-------------------------------|-------------|-------------|--------|--------|----------------|----------------|-------------------------------|-------------|-------------|--------|--------|----------------|----------------|
|          | AUC<br>(95% CI)               | Sensitivity | Specificity | PPV    | NPV    | Positive<br>LR | Negative<br>LR | AUC<br>(95% CI)               | Sensitivity | Specificity | PPV    | NPV    | Positive<br>LR | Negative<br>LR |
| HC vs Ta | 0.9614<br>(0.9341-<br>0.9887) | 0.9091      | 0.9153      | 0.9000 | 0.9231 | 10.7273        | 0.0993         | 0.9717<br>(0.9606-<br>0.9829) | 0.9184      | 0.9442      | 0.9357 | 0.9289 | 16.4496        | 0.0865         |
| HC vs T1 | 0.9460<br>(0.8846-<br>1.0070) | 0.9143      | 0.9153      | 0.7619 | 0.9730 | 10.7886        | 0.0937         | 0.9892<br>(0.9838-<br>0.9945) | 0.9299      | 0.9442      | 0.9133 | 0.9551 | 16.6556        | 0.0743         |
| HC vs T2 | 0.9286<br>(0.8283-<br>1.0290) | 0.8947      | 0.9153      | 0.6296 | 0.9818 | 10.5579        | 0.1150         | 0.9913<br>(0.9855-<br>0.9971) | 0.9196      | 0.9442      | 0.7518 | 0.9846 | 16.4724        | 0.0851         |
| HC vs T3 | 0.9583<br>(0.9000-<br>1.0170) | 0.9500      | 0.9153      | 0.6552 | 0.9908 | 11.2100        | 0.0546         | 0.9760<br>(0.9504-<br>1.0020) | 0.9286      | 0.9442      | 0.6566 | 0.9914 | 16.6324        | 0.0757         |
| HC vs T4 | 0.9753<br>(0.9401-<br>1.0110) | 0.9091      | 0.9153      | 0.5000 | 0.9908 | 10.7273        | 0.0993         | 0.9835<br>(0.9561-<br>1.0110) | 0.9167      | 0.9442      | 0.3929 | 0.9965 | 16.4191        | 0.0883         |
| HC vs G1 | 0.9595<br>(0.9254-<br>0.9936) | 0.9130      | 0.9153      | 0.8630 | 0.9474 | 10.7739        | 0.0950         | 0.9896<br>(0.9840-<br>0.9951) | 0.9068      | 0.9442      | 0.8815 | 0.9567 | 16.2426        | 0.0987         |
| HC vs G2 | 0.9578<br>(0.9192-<br>0.9964) | 0.9079      | 0.9153      | 0.8734 | 0.9391 | 10.7132        | 0.1006         | 0.9695<br>(0.9565-<br>0.9826) | 0.9268      | 0.9442      | 0.9248 | 0.9457 | 16.6011        | 0.0775         |
| HC vs G3 | 0.9513<br>(0.9093-<br>0.9933) | 0.9211      | 0.9153      | 0.7778 | 0.9730 | 10.8684        | 0.0863         | 0.9855<br>(0.9786-<br>0.9924) | 0.9300      | 0.9442      | 0.9163 | 0.9536 | 16.6579        | 0.0741         |

HC, healthy control; AUC, area under curve; PPV, positive predictive value; NPV, negative predictive value; LR, likelihood ratio; CI, confidence interval.

**Supplementary Table 4. Correlation between AG31 levels and clinicopathologic characteristics of bladder cancer patients in both test and validation groups.**

| Variable           | Test (n=184)          |                       | p value            | Validation (n=1130)   |                       | p value |
|--------------------|-----------------------|-----------------------|--------------------|-----------------------|-----------------------|---------|
|                    | Negative (Percentage) | Positive (Percentage) |                    | Negative (Percentage) | Positive (Percentage) |         |
|                    | 17                    | 167                   |                    | 87                    | 1043                  |         |
| Age (years)        |                       |                       |                    |                       |                       |         |
| ≤63                | 9 (9.78%)             | 83 (90.22%)           | 0.702              | 31 (6.33%)            | 459 (93.67%)          | 0.787   |
| >63                | 7 (8.14%)             | 79 (91.86%)           |                    | 41 (6.73%)            | 568 (93.27%)          |         |
| Missing            | 1                     | 5                     |                    | 15                    | 16                    |         |
| Gender             |                       |                       |                    |                       |                       |         |
| Female             | 4 (12.50%)            | 28 (87.50%)           | 0.495 <sup>+</sup> | 13 (5.56%)            | 221 (94.44%)          | 0.425   |
| Male               | 12 (8.28%)            | 133 (91.72%)          |                    | 61 (7.03%)            | 807 (92.97%)          |         |
| Missing            | 1                     | 6                     |                    | 13                    | 15                    |         |
| Pathological stage |                       |                       |                    |                       |                       |         |
| Ta+T1              | 12 (8.96%)            | 122 (91.04%)          | 0.718 <sup>+</sup> | 71 (7.68%)            | 853 (92.32%)          | 0.968   |
| T2+T3+T4           | 5 (10.00%)            | 45 (90.00%)           |                    | 16 (7.77%)            | 190 (92.23%)          |         |
| Pathological grade |                       |                       |                    |                       |                       |         |
| G1                 | 6 (8.70%)             | 63 (91.30%)           | 0.986              | 26 (9.32%)            | 253 (90.68%)          | 0.242   |
| G2+G3              | 10 (8.77%)            | 104 (91.23%)          |                    | 61 (7.17%)            | 790 (92.83%)          |         |
| Missing            | 1                     |                       |                    |                       |                       |         |
| Hematuria          |                       |                       |                    |                       |                       |         |
| Visible            | 4 (21.05%)            | 15 (78.95%)           | 0.081 <sup>+</sup> | 26 (7.22%)            | 334 (92.78%)          | 0.681   |
| Non-visible        | 13 (7.88%)            | 152 (92.12%)          |                    | 61 (7.92%)            | 709 (92.08%)          |         |
| Tumor recurrence   |                       |                       |                    |                       |                       |         |
| Yes                | 2 (7.41%)             | 25 (92.59%)           | 1.000 <sup>+</sup> | 23 (12.23%)           | 165 (87.77%)          | <0.001  |
| No                 | 13 (9.70%)            | 121 (90.30%)          |                    | 44 (4.96%)            | 843 (95.04%)          |         |
| Missing            | 2                     | 21                    |                    | 20                    | 35                    |         |

\*: Fisher exact test. Chi-square tests for all the other analysis.
